# Supplementary material for: Gas uptake, molecular sensing and organocatalytic performances of a multifunctional carbazole-based conjugated microporous polymer
Source: Royal Society of Chemistry journal article supplement (doi:10.1039/c4ta01871k), 2014-01-01
Supplement: c4ta01871k1.pdf [file c4ta01871k1.pdf]

## Electronic Supplementary Information (ESI)

### Gas uptake, molecular sensing and organocatalytic performances of a multifunctional carbazole-based conjugated microporous polymer

Yuwei Zhang<sup>a</sup>, Sigen A<sup>a</sup>, Yongcun Zou<sup>b</sup>, Xiaolong Luo<sup>b</sup>, Zhongping Li<sup>a</sup>, Hong Xia<sup>c</sup>, Xiaoming Liu<sup>a\*</sup>, Ying Mu<sup>a</sup>

<sup>a</sup> State Key Laboratory for Supramolecular Structure and Materials, College of Chemistry, Jilin University, Changchun 130012, P. R.China

<sup>b</sup> State Key Laboratory of Inorganic Synthesis and Preparative Chemistry, College of Chemistry, Jilin University, Changchun, 130012, P.R.China.

<sup>c</sup> State Key Laboratory on Integrated Optoelectronics, College of Electronic Science and Technology, Jilin University, Changchun 130012, P. R.China

Email: xm\_liu@jlu.edu.cn

## Section 1. TGA Profile

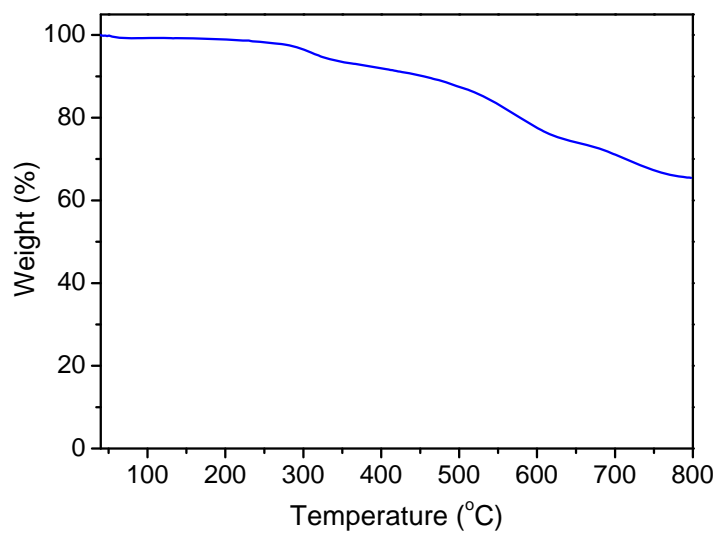

**Fig. S1** TGA curve of MFCMP-1 under nitrogen.

## Section 2. FT IR Spectra

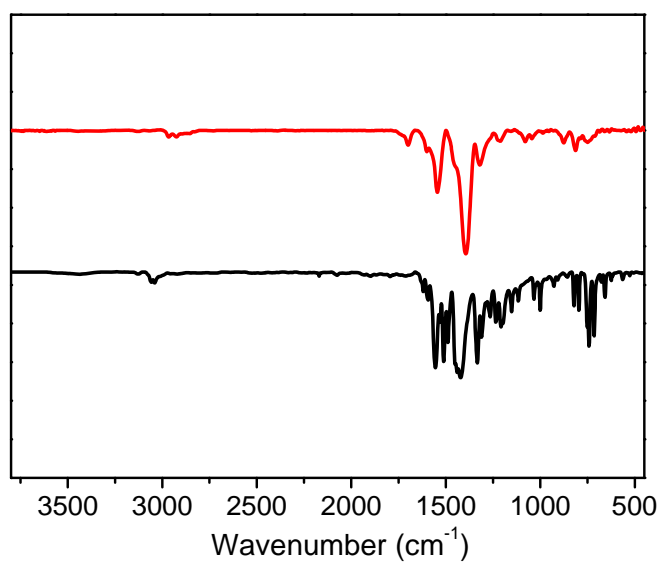

**Fig. S2** IR spectra of MFCMP-1 (red line) and its monomer (black line).

### Section 3. Powder X-Ray Diffraction

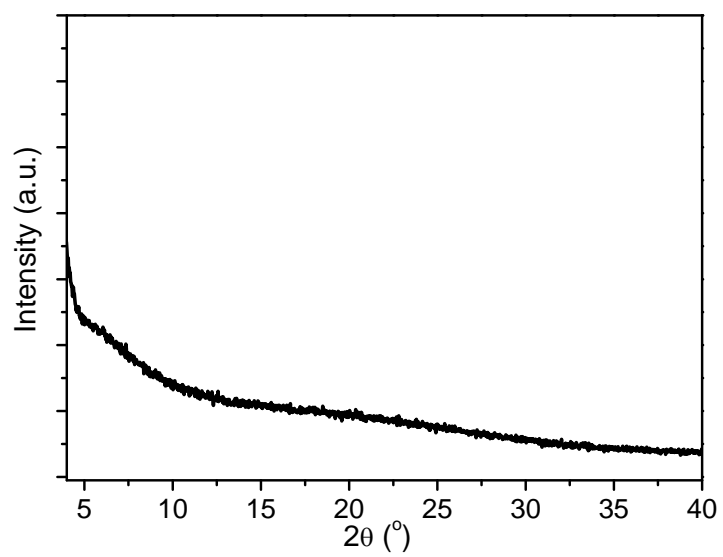

**Fig. S3** PXRD curve of MFCMP-1.

#### Section 4. SEM, DLS and TEM

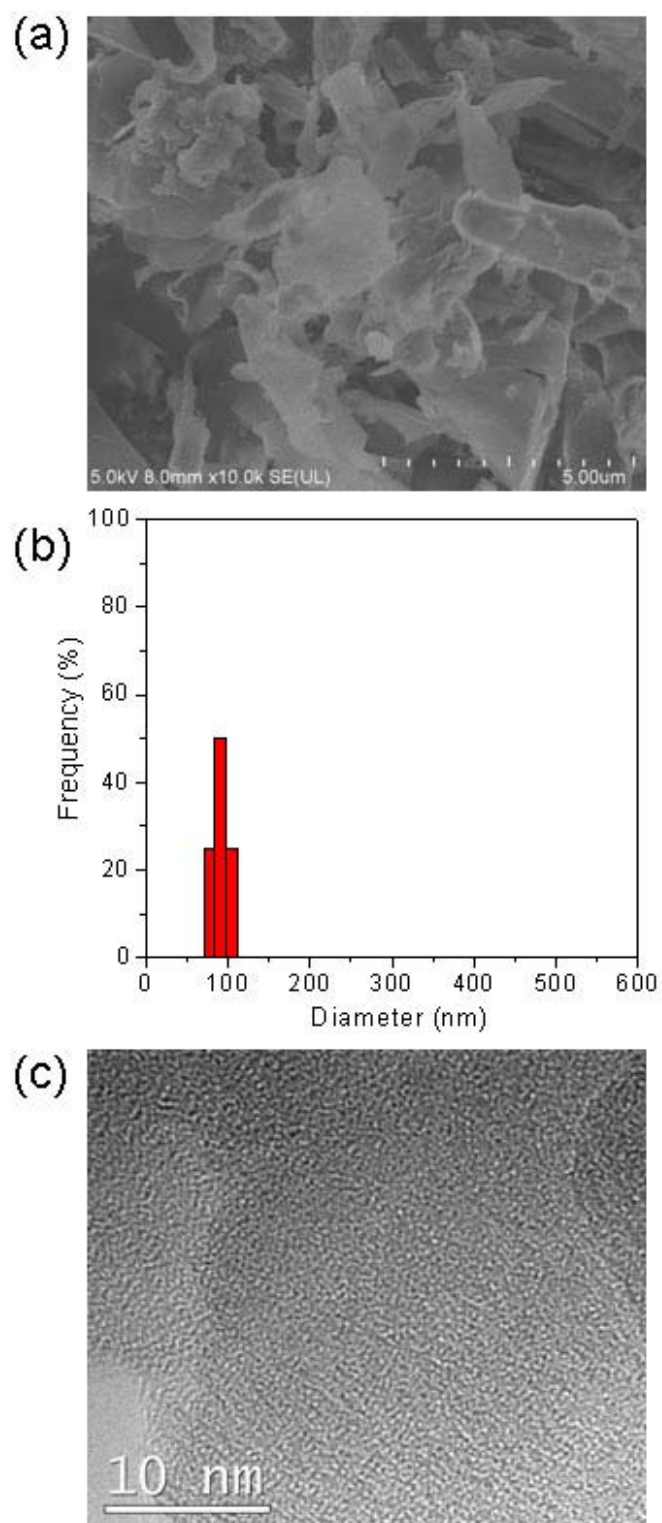

**Fig. S4** (a) SEM image, (b) DLS profile and (c) TEM image of MFCMP-1.

## Section 5. Uptake of CO<sub>2</sub> at high pressure

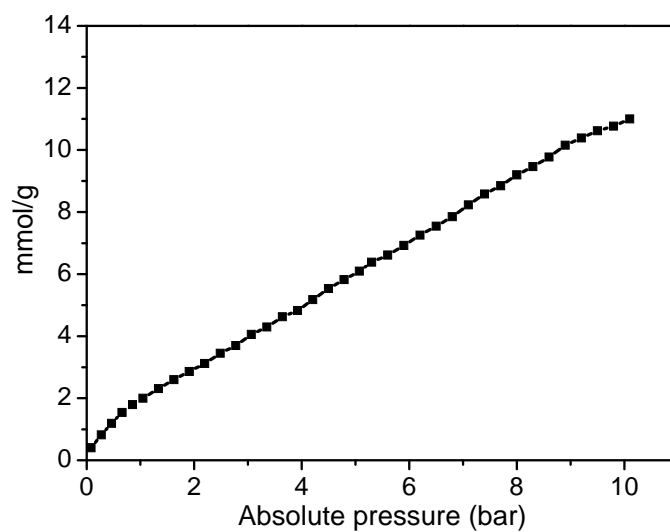

**Fig. S5** Adsorption isotherm of MFCMP-1 for CO<sub>2</sub> at 298 K and 10 bar.

## Section 6. Adsorption Selectivity

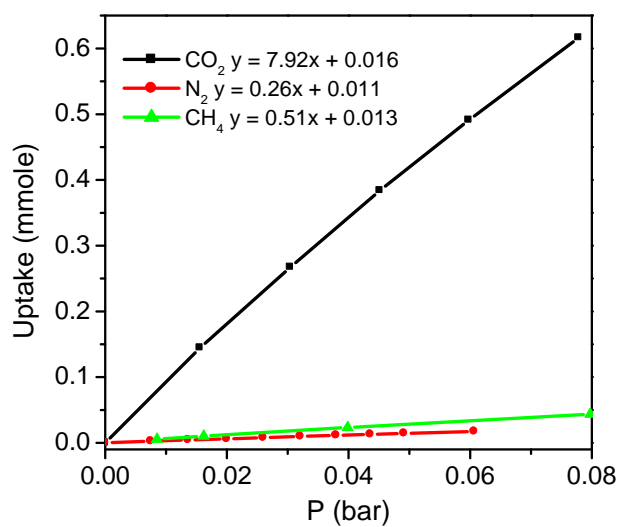

**Fig. S6** CO<sub>2</sub>/N<sub>2</sub> and CO<sub>2</sub>/CH<sub>4</sub> initial slope selectivity studies for MFCMP-1.

## Section 7. Stability of Water Vapor

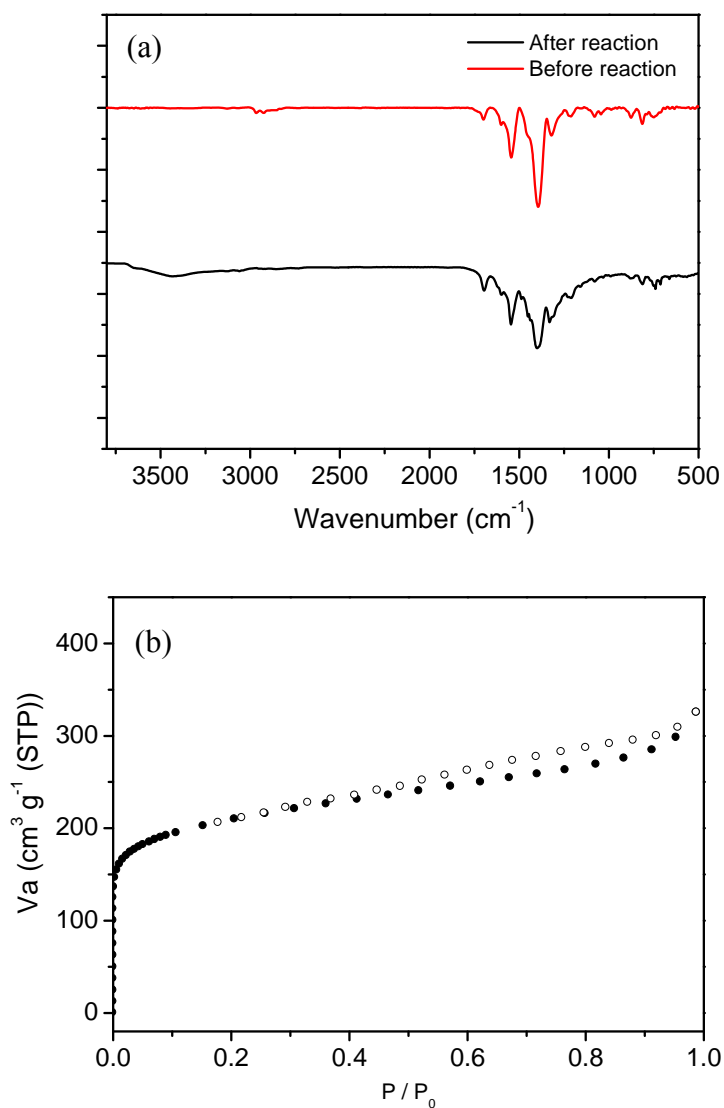

**Fig. S7** (a) IR spectra of MFCMP-1 samples fresh (red line) and after reaction 5h in boiling water (black line) (b) Nitrogen adsorption/desorption isotherms (●: adsorption, ○: desorption) of MFCMP-1 samples after reaction 5h in boiling water, the surface area is  $768 \text{ m}^2 \text{ g}^{-1}$ .

## Section 8. FT IR Spectra

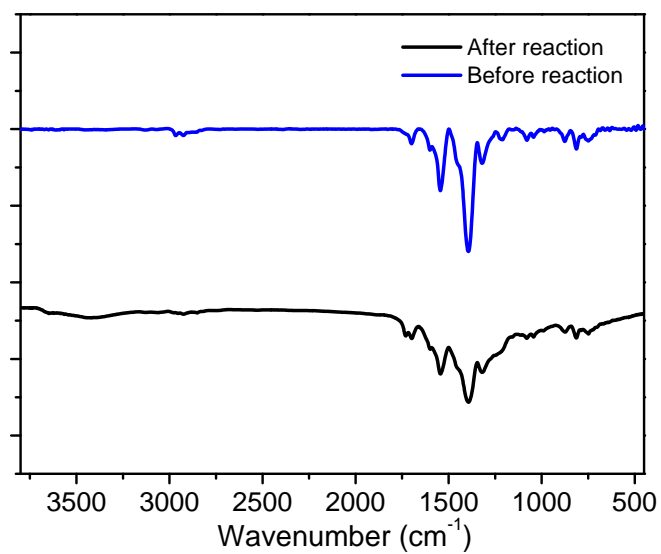

**Fig. S8** IR spectra of MFCMP-1 samples fresh (red line) and after six-time catalytic reaction (black line). It is evident that the structure of MFCMP-1 was maintained after catalytic reactions.

## Section 9. Catalytic Data

**Table S1.** The Knoevenagel condensation of benzaldehyde with malononitrile catalyzed by MFCMP-1 in varying solvent <sup>a)</sup>

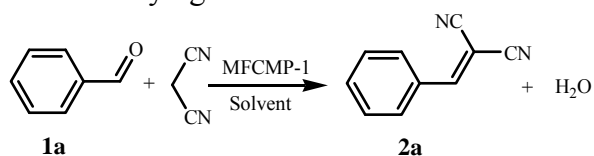

| Entry            | Solvent                  | Amount (mL) | Time (h) | Yield (%) <sup>b</sup> |
|------------------|--------------------------|-------------|----------|------------------------|
| 1                | Dioxane                  | 0.8         | 4        | 8                      |
| 2                | THF                      | 0.8         | 4        | 7                      |
| 3                | Toluene                  | 0.8         | 4        | 5                      |
| 4                | EtOAc                    | 0.8         | 4        | 4                      |
| 5                | DMF                      | 0.8         | 4        | 5                      |
| 6                | H <sub>2</sub> O         | 0.8         | 4        | 48                     |
| 7                | Methanol                 | 0.8         | 4        | 41                     |
| 8                | Ethanol                  | 0.8         | 4        | 65                     |
| 9                | Ethanol/H <sub>2</sub> O | 0.4 /0.4    | 4        | 76                     |
| 10               | MeOH/H <sub>2</sub> O    | 0.4 /0.4    | 4        | 79                     |
| 11               | DMF/H <sub>2</sub> O     | 0.4 /0.4    | 4        | 91                     |
| 12               | Dioxane/H <sub>2</sub> O | 0.4 /0.4    | 4        | 99                     |
| 13               | Dioxane/H <sub>2</sub> O | 0.4 /0.4    | 2        | 91                     |
| 14               | Dioxane/H <sub>2</sub> O | 0.4 /0.4    | 1        | 82                     |
| 15               | Dioxane/H <sub>2</sub> O | 0.4 /0.4    | 30min    | 68                     |
| 16               | Dioxane/H <sub>2</sub> O | 0.4 /0.4    | 10min    | 32                     |
| 17 <sup>c)</sup> | Dioxane/H <sub>2</sub> O | 0.4 /0.4    | 2        | 98                     |
| 18 <sup>d)</sup> | Dioxane/H <sub>2</sub> O | 0.4 /0.4    | 10min    | 22                     |
| 19 <sup>d)</sup> | Dioxane/H <sub>2</sub> O | 0.4 /0.4    | 30min    | 30                     |
| 20 <sup>d)</sup> | Dioxane/H <sub>2</sub> O | 0.4 /0.4    | 1        | 39                     |
| 21 <sup>d)</sup> | Dioxane/H <sub>2</sub> O | 0.4 /0.4    | 2        | 59                     |
| 22 <sup>d)</sup> | Dioxane/H <sub>2</sub> O | 0.4 /0.4    | 4        | 76                     |
| 23 <sup>d)</sup> | Dioxane/H <sub>2</sub> O | 0.4 /0.4    | 7        | 95                     |

<sup>a)</sup> Reaction conditions: benzaldehyde (0.2 mmol), malononitrile (0.2 mmol), MFCMP-1 (1.0 mol % of the substrate), 25 °C; <sup>b)</sup> Determined by GC using undecane as internal standard; <sup>c)</sup> malononitrile (0.3 mmol); <sup>d)</sup> MFCMP-1 0.5 mol % of the substrate.



## Section 10. Sorption Isotherms

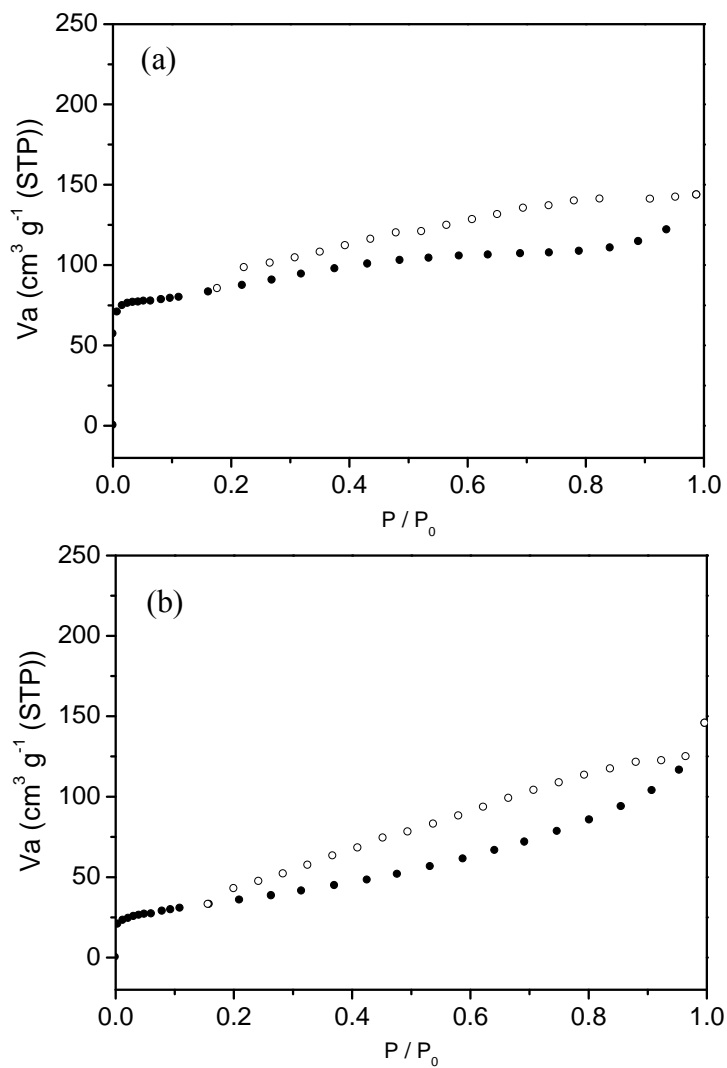

**Fig. S9** Nitrogen adsorption (●) and desorption (○) isotherm profiles of MFCMP-1 prepared in  $\text{CH}_3\text{CN}/\text{CHCl}_3$  (a) and  $\text{CH}_3\text{CN}$  (b).

## Section 11. The Characterization of Products

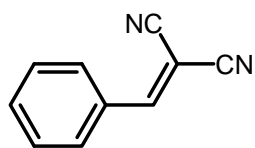

**2a:** White solid; m.p. 83-84 °C (lit.,<sup>2</sup> 84 °C); <sup>1</sup>H NMR (300MHz, CDCl<sub>3</sub>) δ 7.54 (t, *J* = 9.0 Hz, *J* = 6.0 Hz, 2H), 7.64 (t, *J* = 6.0 Hz, 1H), 7.78 (s, 1H), 7.92 (d, *J* = 9.0 Hz, 2H) ppm. GC-MS retention time 5.442 min., *m/z* (EI) 154 (M<sup>+</sup>, 81), 127 (98), 103 (100).

<sup>1</sup>H-NMR spectrum of 2a

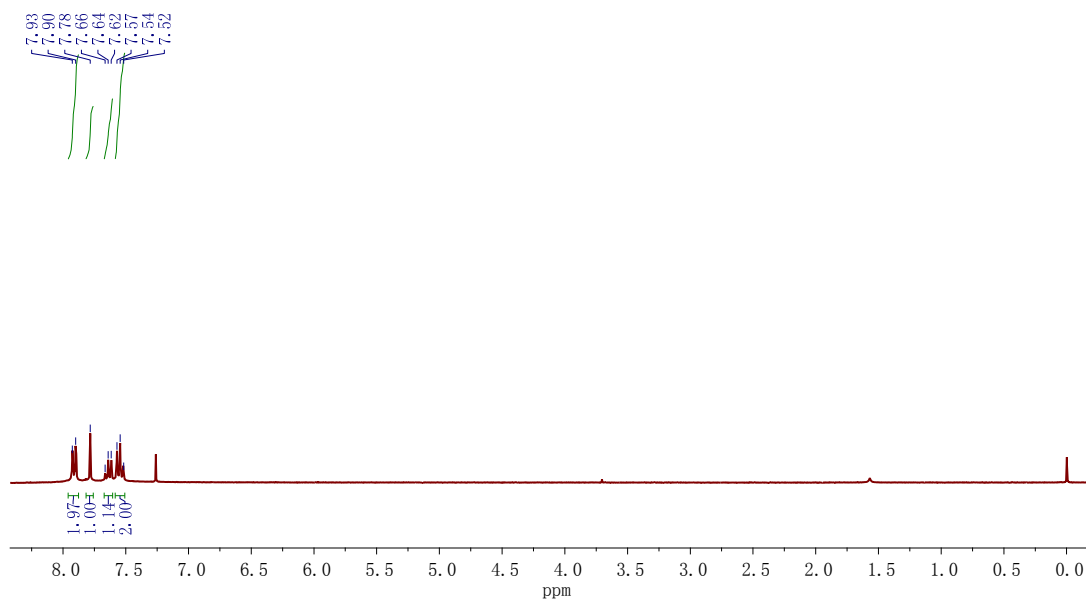

GC-MS spectra of 2a

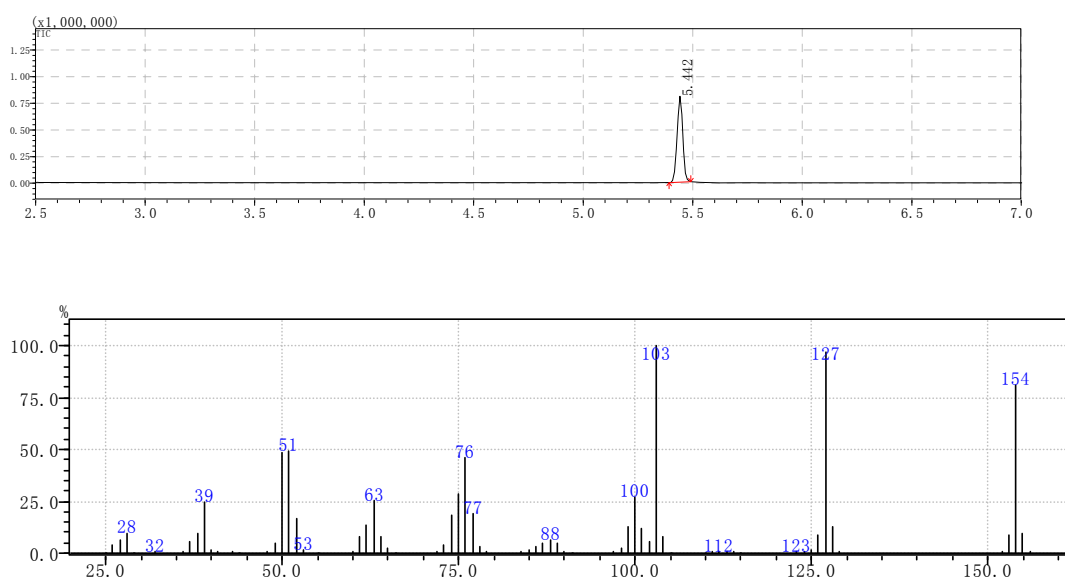

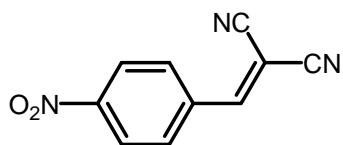

**2b:** Pale solid; m.p. 164-166 °C (lit.,<sup>3</sup> 167-168 °C); <sup>1</sup>H NMR (300MHz, CDCl<sub>3</sub>) δ 7.88 (s, 1H), 8.08 (d, *J* = 9.0 Hz, 2H), 8.39 (d, *J* = 9.0 Hz, 2H) ppm. GC-MS retention time 5.785 min., *m/z* (EI) 199 (M<sup>+</sup>, 13), 153 (16), 141 (23), 126 (35), 114 (28), 100 (29), 75 (49), 63 (29).

<sup>1</sup>H-NMR spectrum of 2b

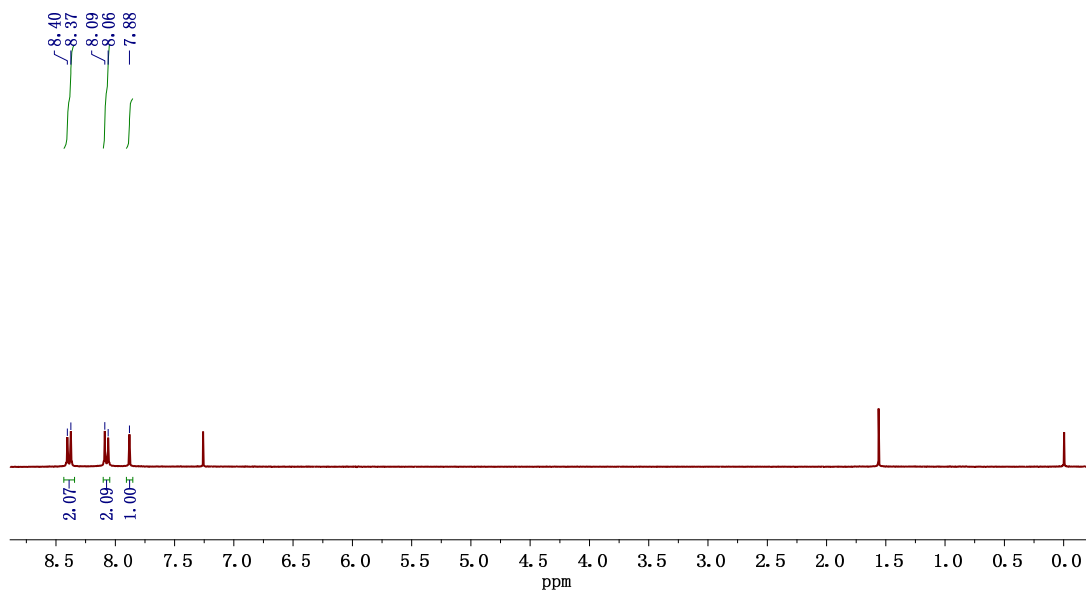

GC-MS spectra of 2b

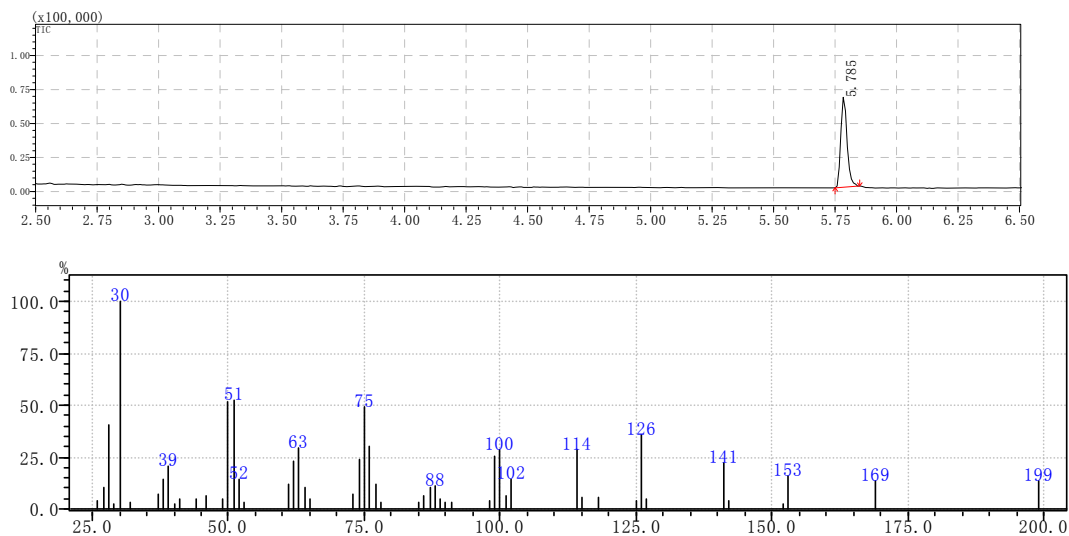

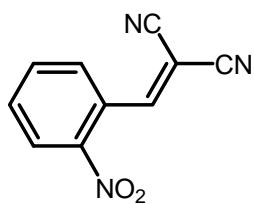

**2c:** White solid; m.p. 135-136 °C (lit.,<sup>4</sup> 136-138 °C); <sup>1</sup>H NMR

(300MHz, CDCl<sub>3</sub>) δ 7.81–7.88 (m, 5H), 8.35 (d, *J* = 9.0 Hz, 1H), 8.45 (s, 1H) ppm. GC-MS retention time 5.309 min., m/z (EI) 199 (M<sup>+</sup>, 16), 144 (18), 126 (39), 114 (47), 92 (100), 75 (53), 51 (50).

<sup>1</sup>H-NMR spectrum of 2c

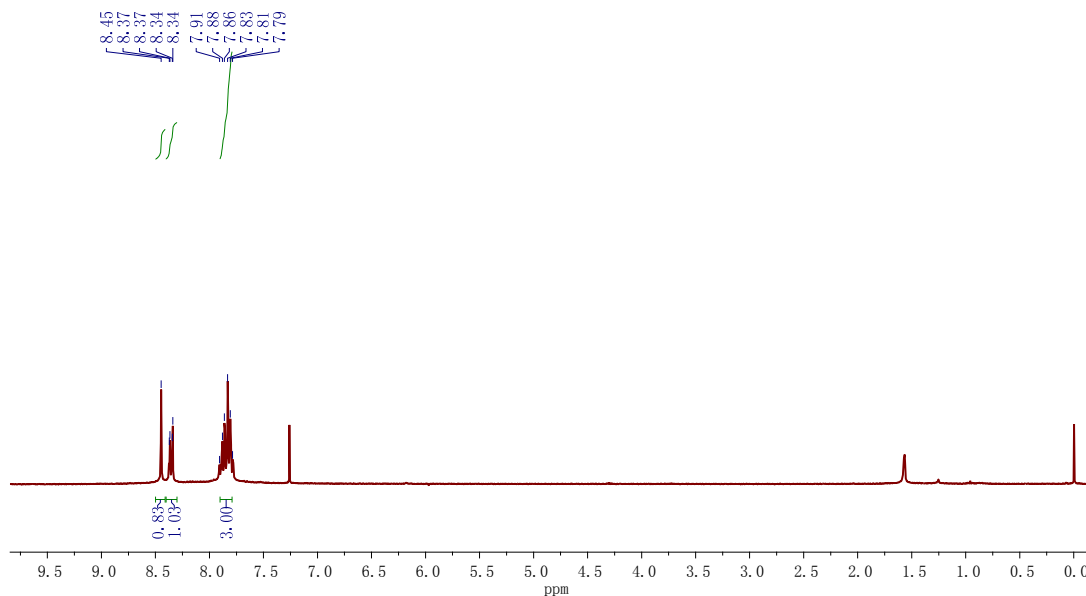

GC-MS spectra of 2c

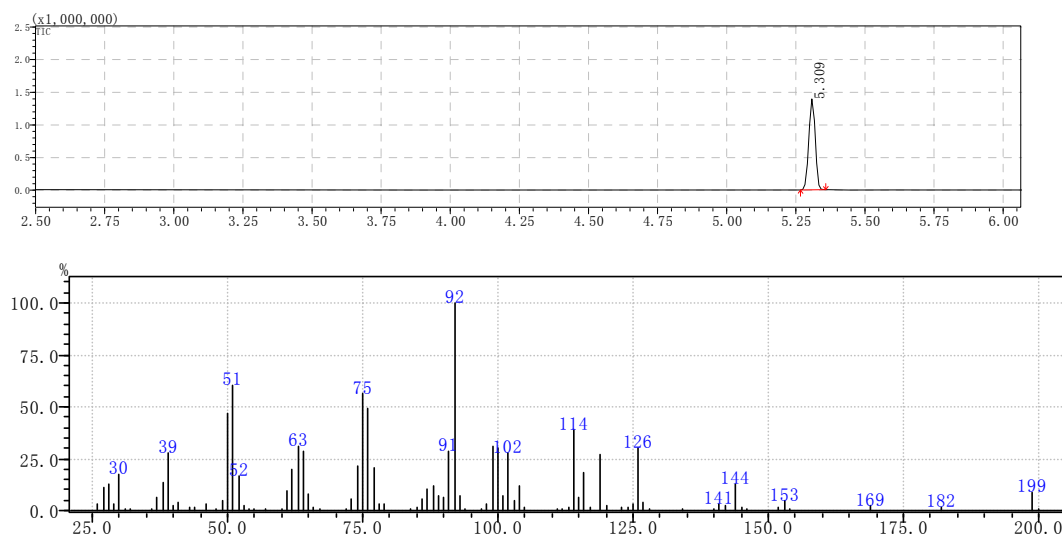

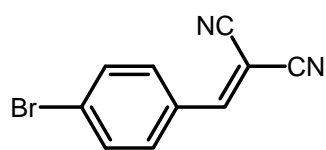

**2d**: White solid; m.p. 155-157 °C (lit.,<sup>5</sup> 159-161 °C); <sup>1</sup>H NMR (300MHz, CDCl<sub>3</sub>) δ 7.69 (d, *J* = 9.0 Hz, 2H), 7.72 (s, 1H), 7.78 (d, *J* = 9.0 Hz, 2H) ppm. GC-MS retention time 5.349 min., m/z (EI) 234 (M<sup>+</sup>, 32), 153 (100), 126 (45), 99 (36), 75 (63), 63 (38), 50 (69).

<sup>1</sup>H-NMR spectrum of 2d

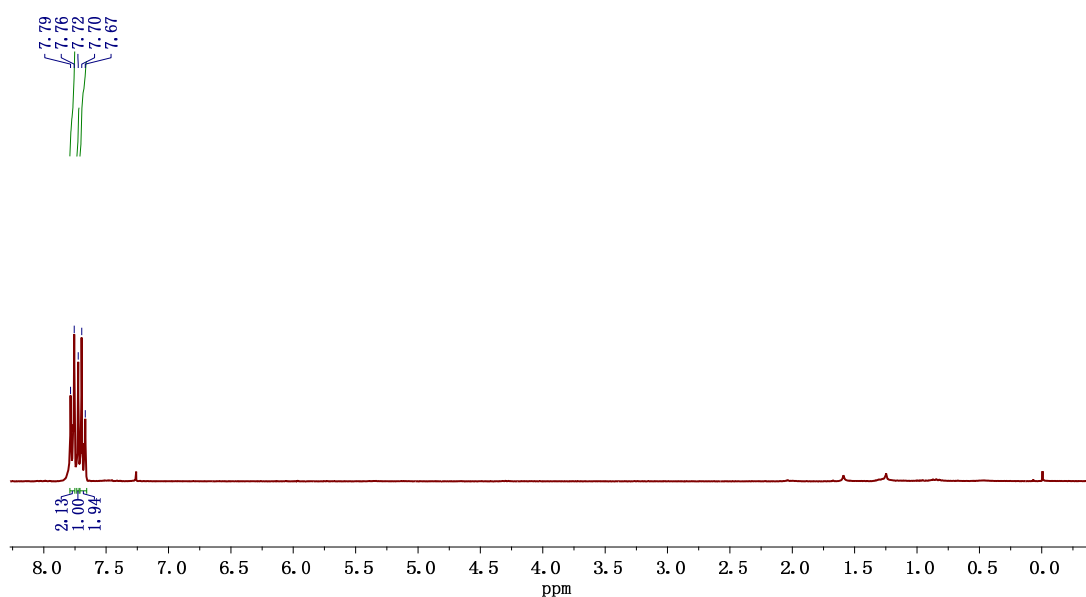

GC-MS spectra of 2d

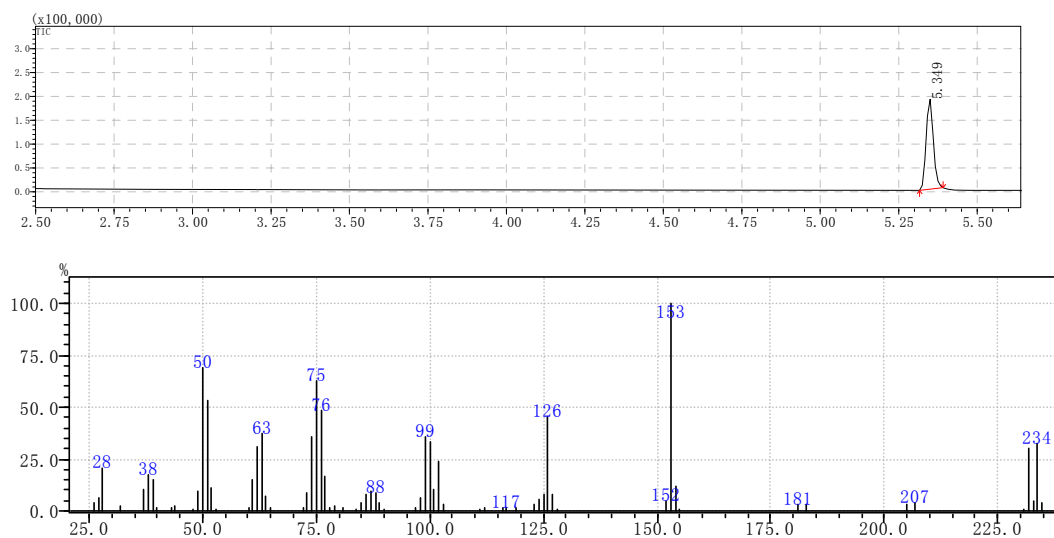

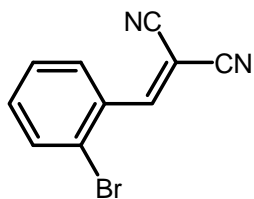

**2e**: White solid; m.p. 90-92 °C (lit.,<sup>5</sup> 92-93 °C); <sup>1</sup>H NMR (300MHz, CDCl<sub>3</sub>) δ 7.48 (m, 2H), 7.75 (d, *J* = 6.0 Hz, 1H), 8.12 (d, *J* = 6.0 Hz, 1H), 8.22 (s, 1H) ppm. GC-MS retention time 4.986 min., *m/z* (EI) 234 (M<sup>+</sup>, 21), 153 (100), 126 (38), 99 (24), 75 (37), 63 (22), 50 (30).

### <sup>1</sup>H-NMR spectrum of **2e**

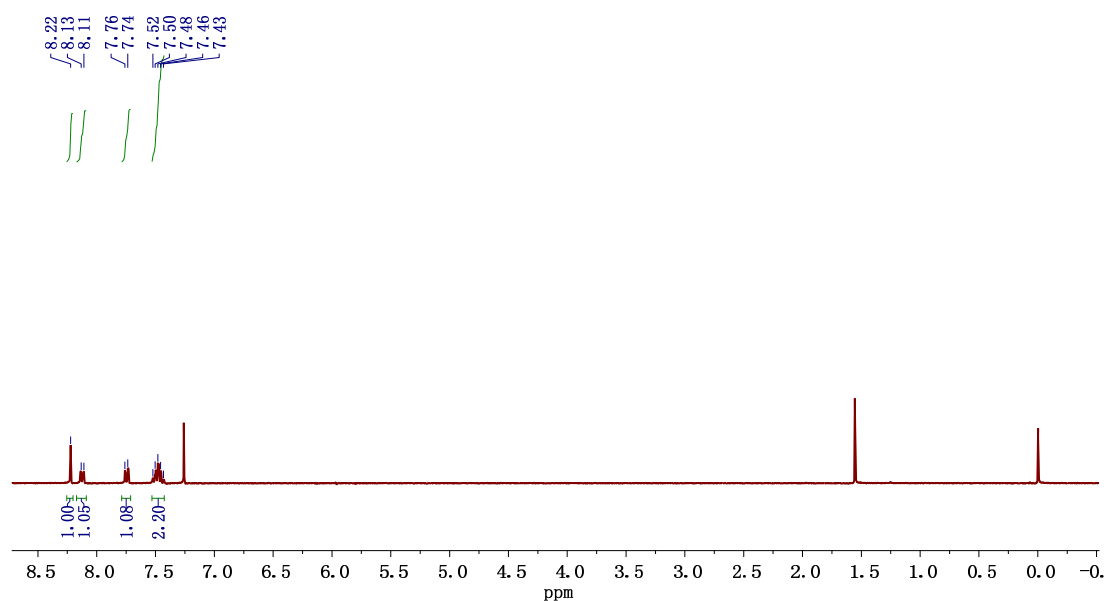

### GC-MS spectra of **2e**

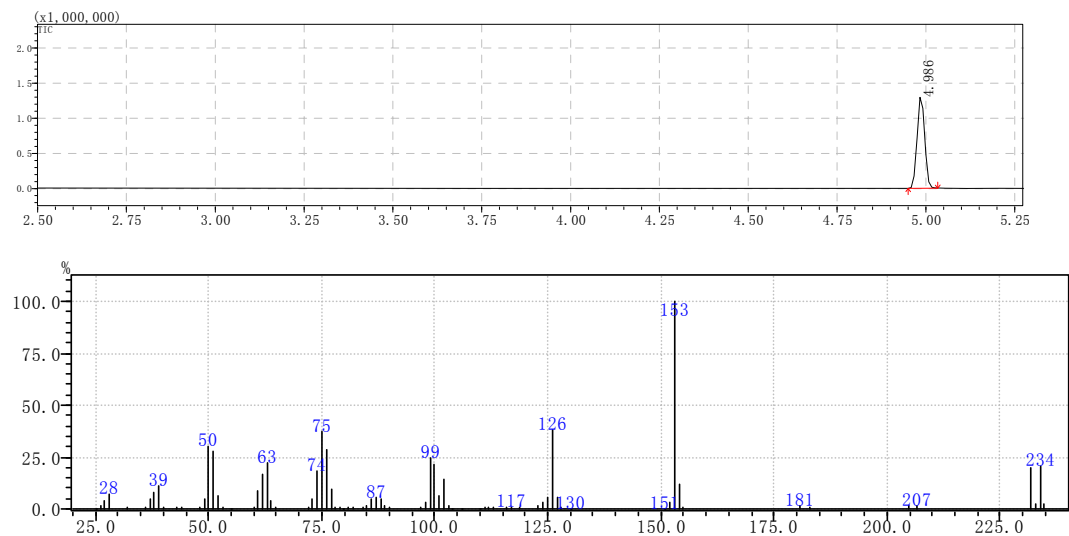

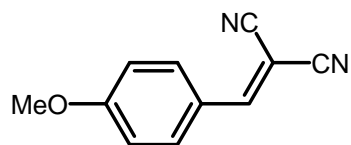

**2f**: Yellow solid; m.p. 114-115 °C (lit.,<sup>2</sup> 116 °C); <sup>1</sup>H NMR (300MHz, CDCl<sub>3</sub>) δ 3.91 (s, 3H), 7.02 (d, *J* = 9.0 Hz, 2H), 7.65 (s, 1H), 7.92 (d, *J* = 9.0 Hz, 2H) ppm. GC-MS retention time 5.498 min., m/z (EI) 184 (M<sup>+</sup>, 66), 141 (35), 133 (26), 114 (100), 88 (38), 64 (28).

<sup>1</sup>H-NMR spectrum of **2f**

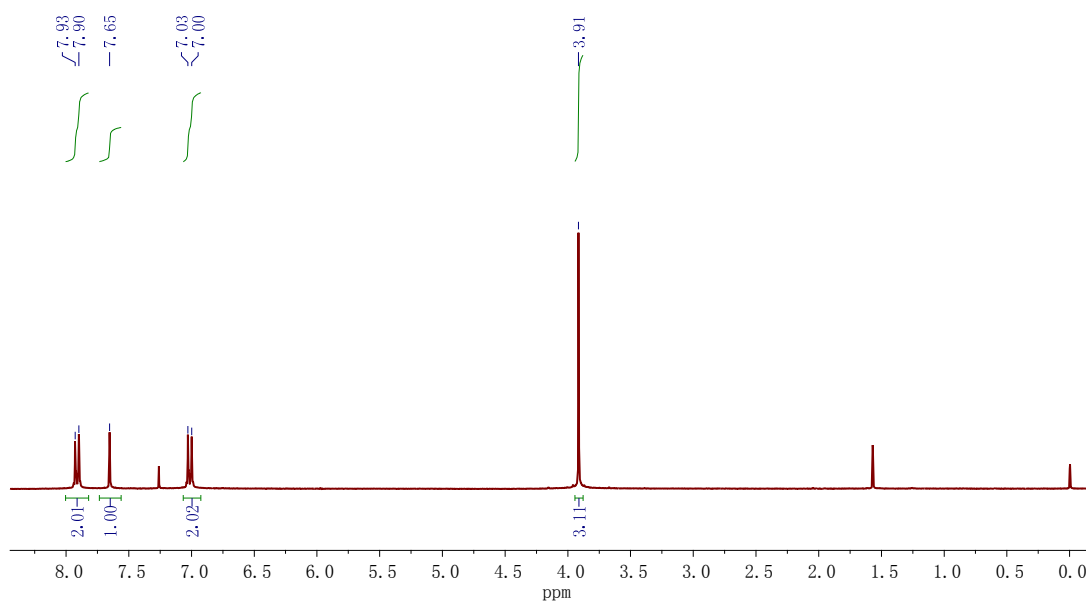

GC-MS spectra of **2f**

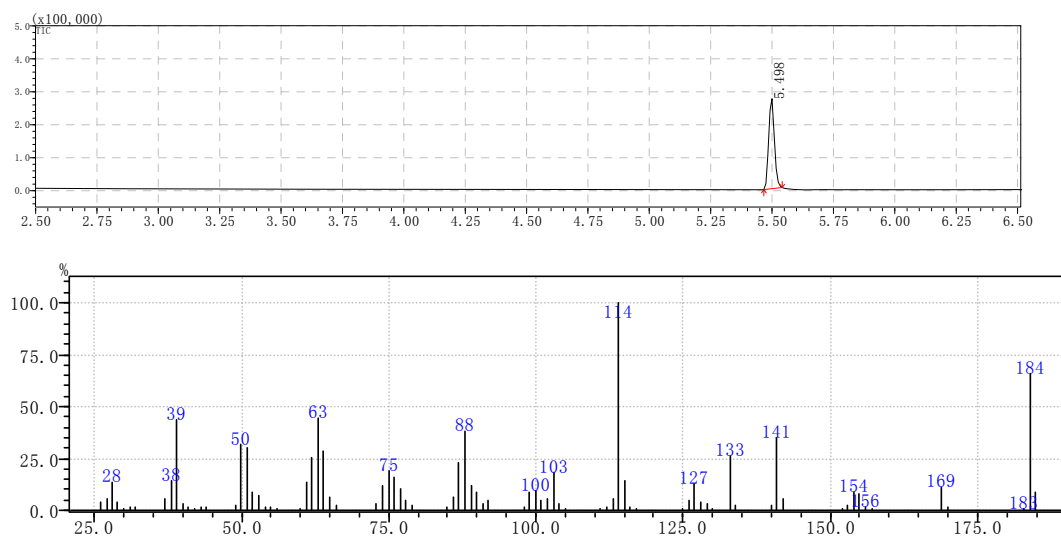

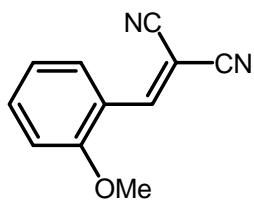

**2g**: Pale yellow solid; m.p. 79-80 °C (lit.,<sup>6</sup> 79-80 °C); <sup>1</sup>H NMR (300MHz, CDCl<sub>3</sub>) δ 3.93 (s, 3H), 6.99 (d, *J* = 9.0 Hz, 1H), 7.08 (t, *J* = 9.0 Hz, 1H), 7.58 (t, *J* = 9.0 Hz, 1H), 8.19 (d, *J* = 9.0 Hz, 1H), 8.31 (s, 1H) ppm. GC-MS retention time 5.208 min., m/z (EI) 184 (M<sup>+</sup>, 36), 119 (79), 114 (87), 91 (100), 88 (39), 78 (56), 63 (47), 51 (40).

### <sup>1</sup>H-NMR spectrum of **2g**

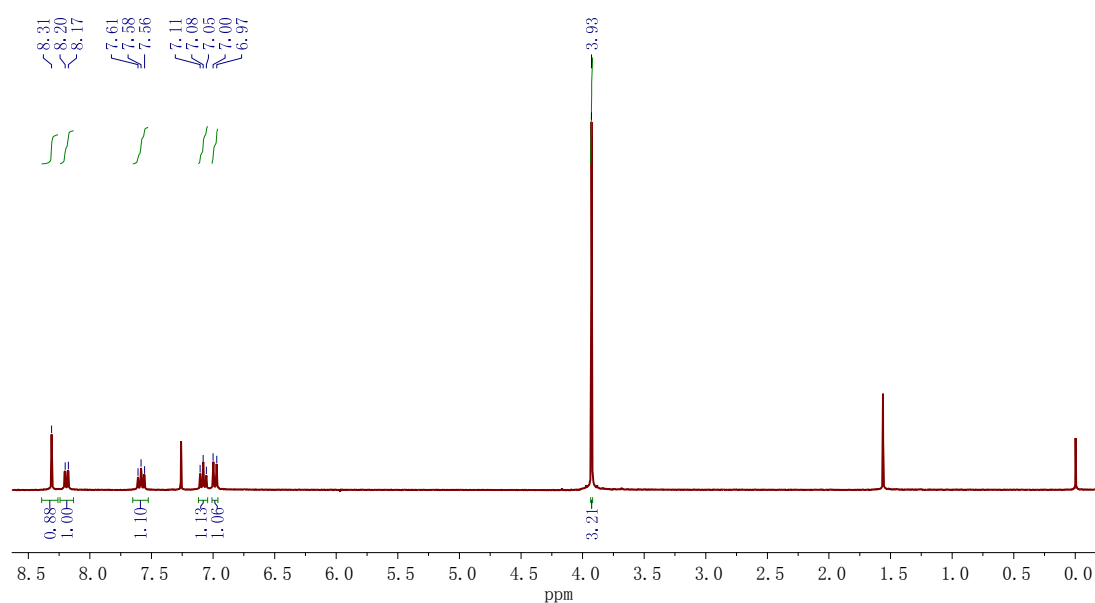

### GC-MS spectra of **2g**

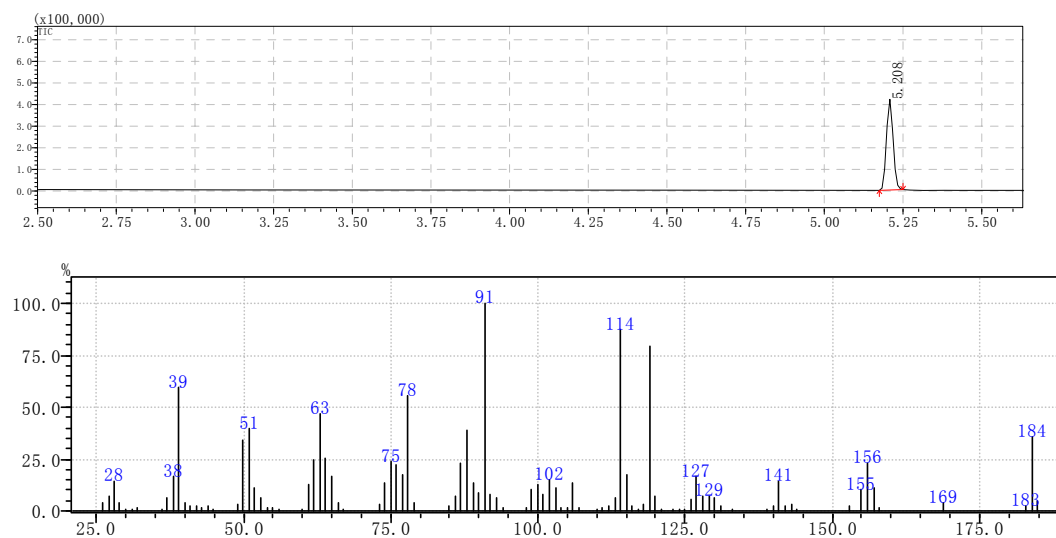



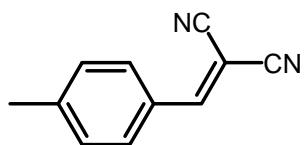

**2h**: White solid; m.p. 130-131 °C (lit.,<sup>3</sup> 132-134 °C); <sup>1</sup>H NMR (300MHz, CDCl<sub>3</sub>) δ 2.46 (s, 3H), 7.34 (d, *J* = 9.0 Hz, 2H), 7.72 (s, 1H), 7.82 (d, *J* = 9.0 Hz, 2H) ppm. GC-MS retention time 4.672 min., *m/z* (EI) 168 (M<sup>+</sup>, 59), 141 (63), 114 (51), 63 (75), 51 (63).

<sup>1</sup>H-NMR spectrum of **2h**

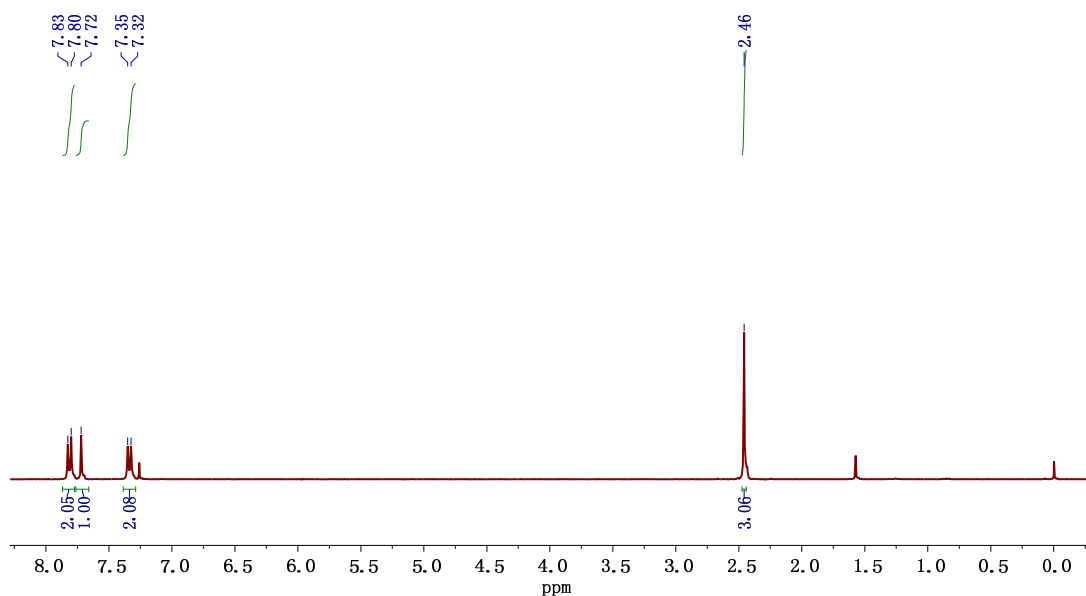

GC-MS spectra of **2h**

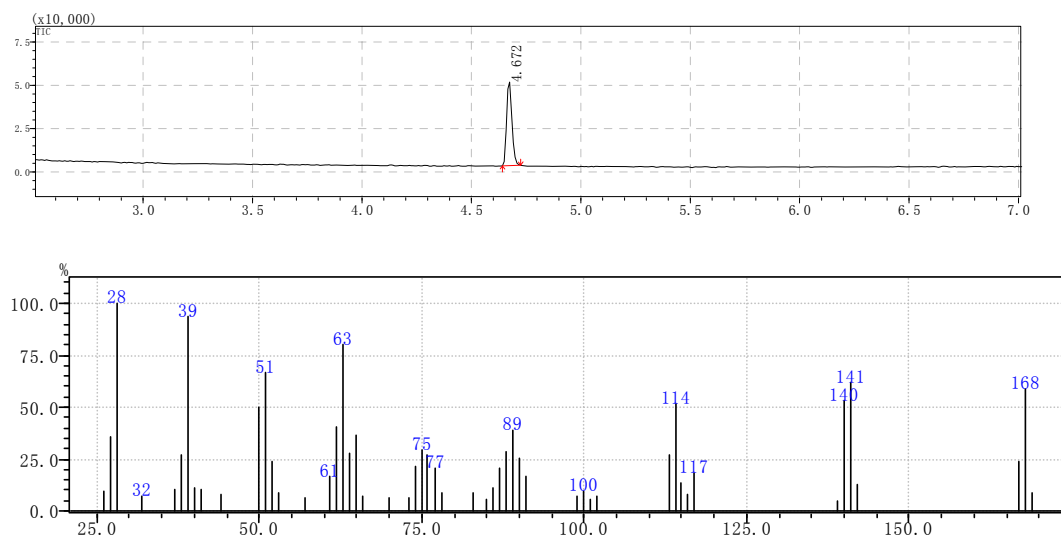

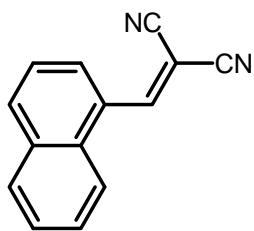

**2i**: Bright orange solid; m.p. 164-165 °C (lit.,<sup>8</sup> 168-169 °C); <sup>1</sup>H NMR (300MHz, CDCl<sub>3</sub>) δ 7.59–7.71 (m, 3H), 7.96 (d, *J* = 6.0 Hz, 2H), 8.12 (d, 6.0 Hz, 1H), 8.28 (d, 6.0 Hz, 1H), 8.66 (s, 1H) ppm. GC-MS retention time 6.338 min., *m/z* (EI) 204 (M<sup>+</sup>, 40), 177 (54), 150 (17), 126 (13), 75 (52), 63 (38), 51 (32).

<sup>1</sup>H-NMR spectrum of **2i**

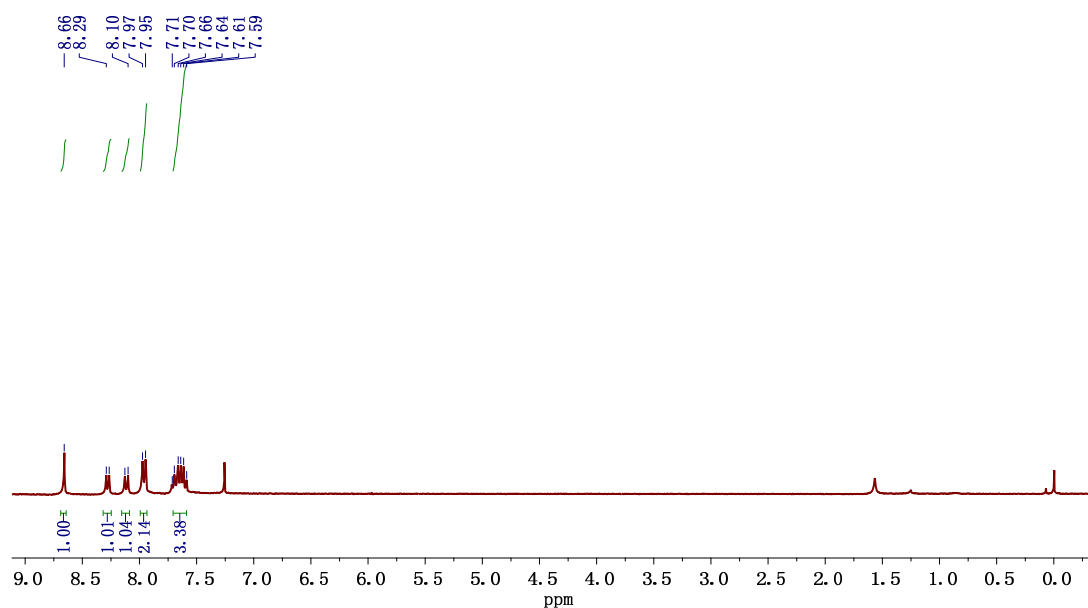

GC-MS spectra of **2i**

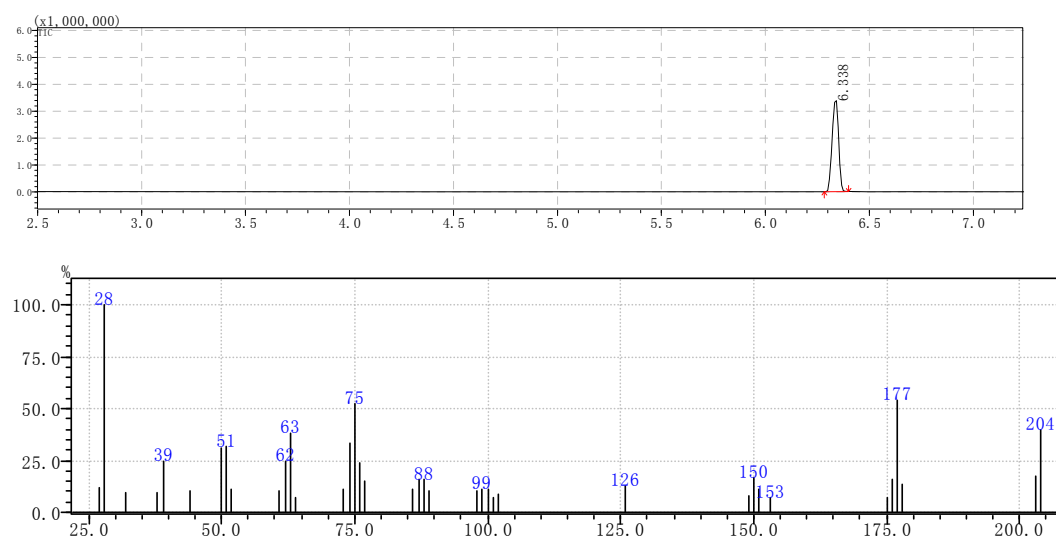

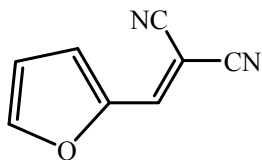

**2j**: Light pink solid; m.p. 70-71 °C (lit.,<sup>9</sup> 72-73 °C); <sup>1</sup>H NMR (300MHz, CDCl<sub>3</sub>) δ 6.72 (dd, 1H), 7.36 (d, *J* = 3.0 Hz, 1H), 7.52 (s, 1H), 7.81 (d, 3.0 Hz, 1H) ppm. GC-MS retention time 3.287 min., m/z (EI) 144 (M<sup>+</sup>, 100), 115 (59), 89 (68), 62 (53).

<sup>1</sup>H-NMR spectrum of **2j**

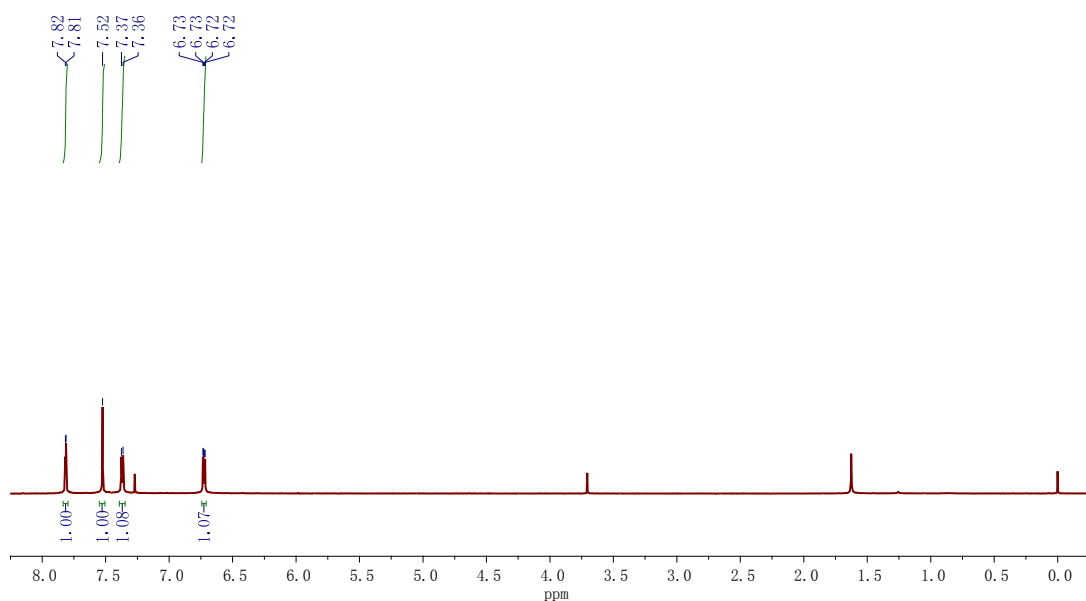

GC-MS spectra of **2j**

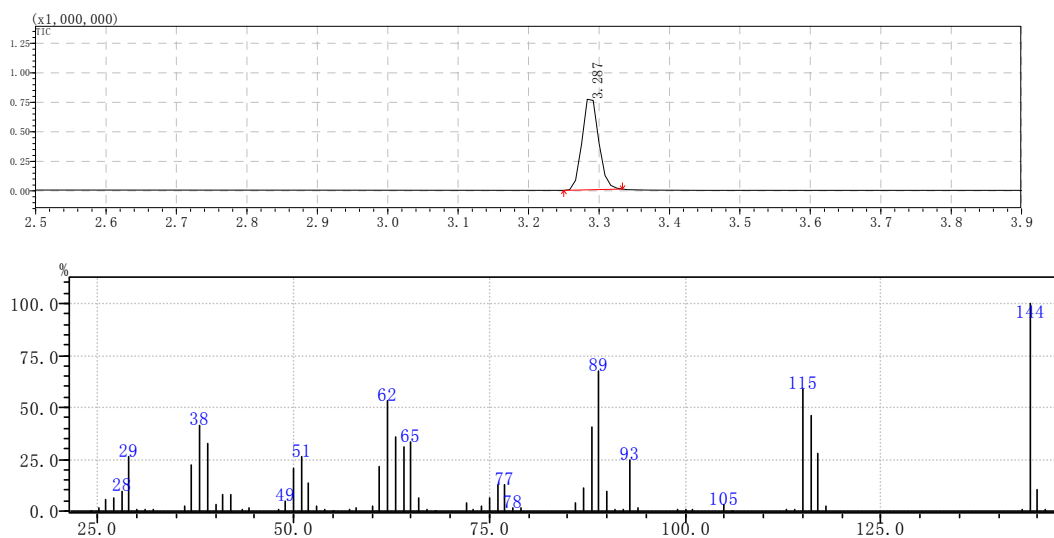

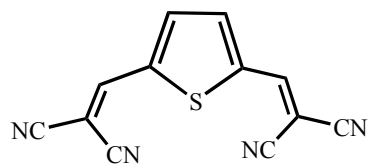

**2k**: Bright yellow solid; m.p. 299-301 °C;  $^1\text{H}$

NMR (300 MHz,  $\text{CDCl}_3$ )  $\delta$  7.86 (s, 2H), 7.96 (s, 2H) ppm. GC-MS retention time 12.854 min., m/z (EI) 237(M+, 15), 209 (6), 185 (6), 121(4), 94 (5).

$^1\text{H}$ -NMR spectrum of **2k**

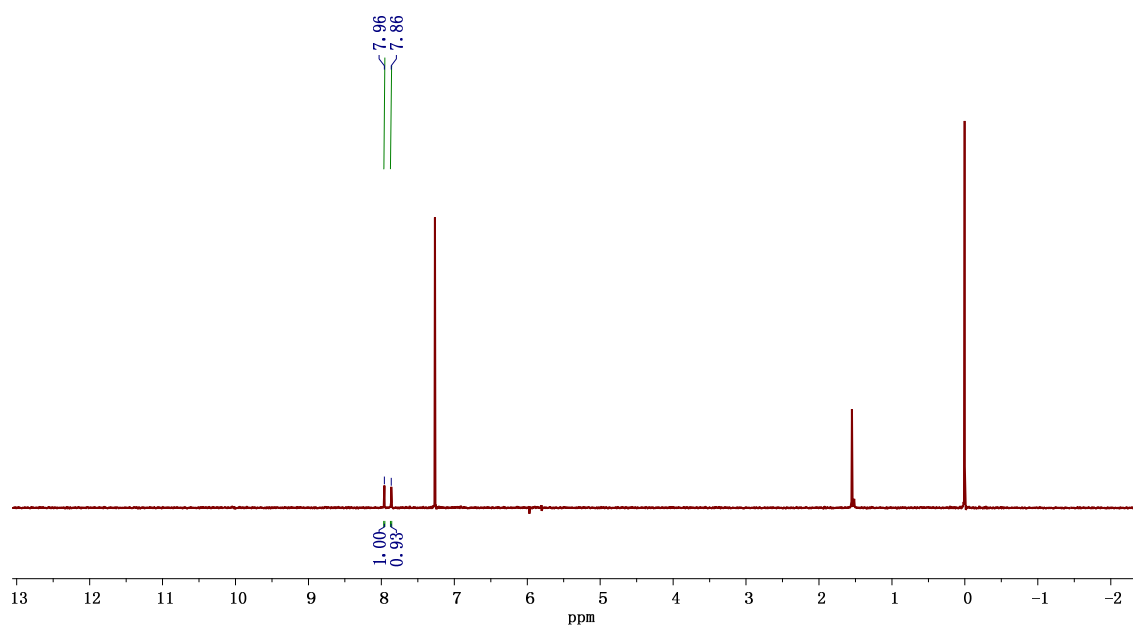

GC-MS spectra of **2k**

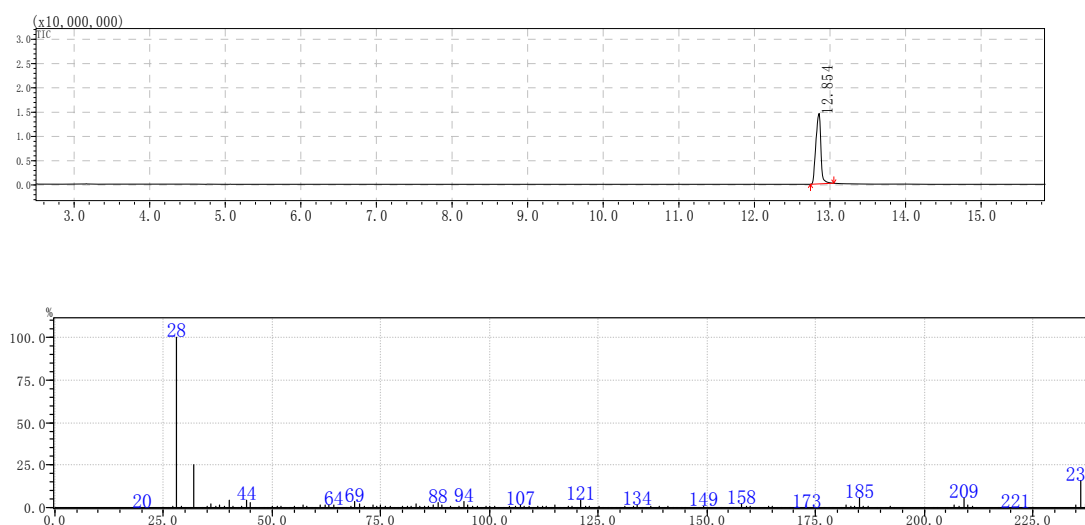

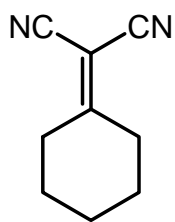

**2I**: Light yellow oil;  $^1\text{H}$  NMR (300MHz,  $\text{CDCl}_3$ )  $\delta$  1.68 (t, 2H), 1.83 (t, 4H), 2.66 (t,  $J = 6.0$  Hz, 4H) ppm. GC-MS retention time 3.554 min.,  $m/z$  (EI) 146 ( $\text{M}^+$ , 5.01), 92 (13), 81 (13), 68 (19), 55 (100).

$^1\text{H}$ -NMR spectrum of 2I

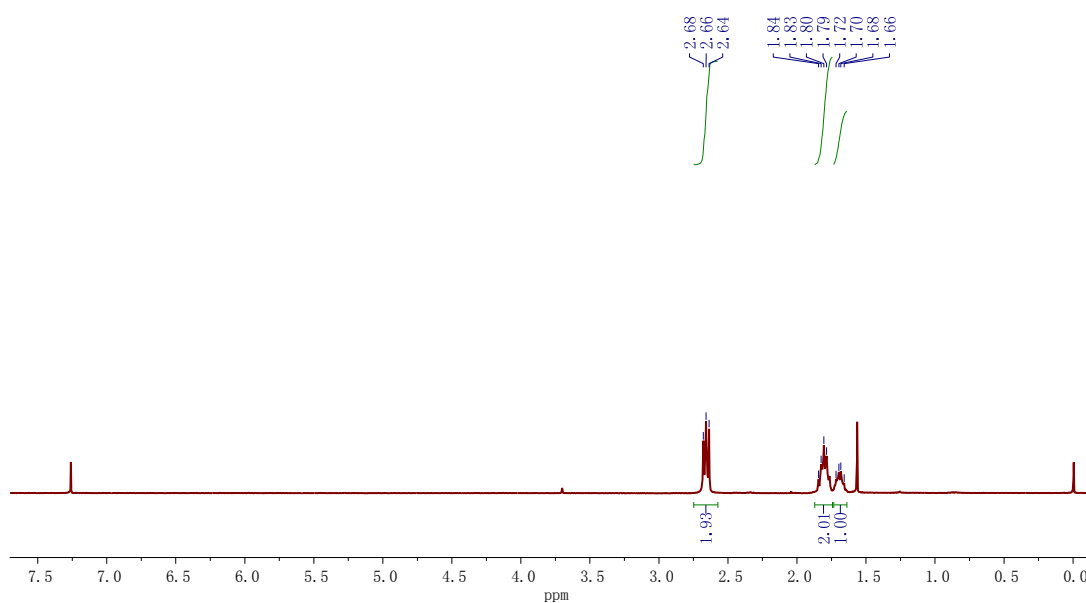

GC-MS spectra of 2I

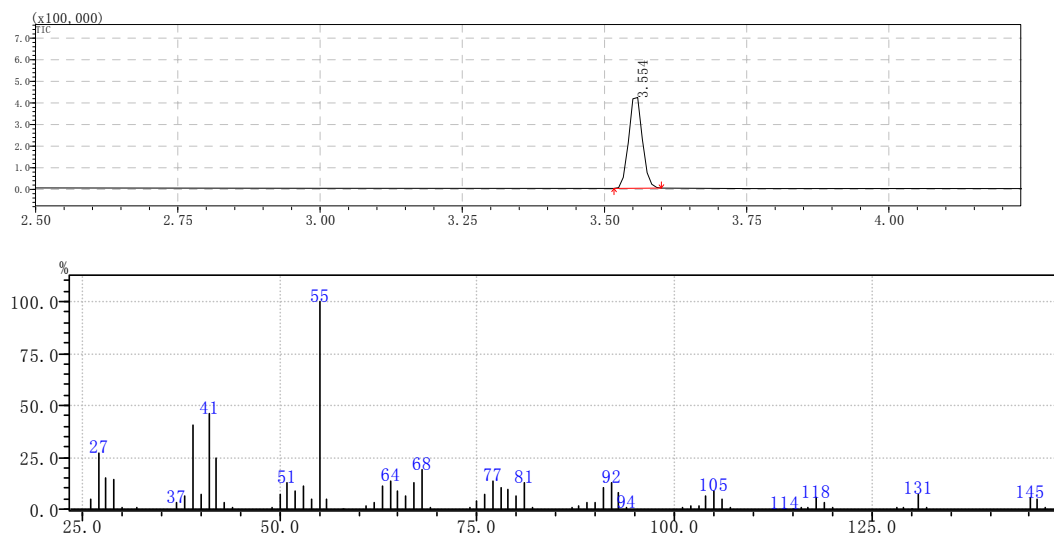

## Section 12. References

- [1] K. Onitsuka, H. Kitajima, M. Fujimoto, A. Iuchi, F. Takei, S. Takahashi, *Chem. Commun.*, **2002**, 2576.
- [2] R. M. Kumbhare, M. Sridhar, *Catal. Commun.*, **2008**, 9, 403.
- [3] R. J. Kalbasi, N. Mosaddegh, *Catal. Commun.*, **2011**, 12,1231.
- [4] A. G. Ying, *J. Chem. Res.*, **2010**, 34, 30.
- [5] E. R. Abd, M. Naglaa, A. El-Kateb, M. F. Mady, *Synth. Commun.*, **2007**, 37, 3961.
- [6] G. W. Li, J. Xiao, W. Q. Zhang, *Green Chem.*, **2011**, 13, 1828.
- [7] C. B. Yue, A. Q. Mao, Y. Y. Wei, M. J. Lü, *Catal. Commun.*, **2008**, 9, 1571.
- [8] F. Hruska, E. Bock, T. Schaefer, *Can. J. Chem.*, **1965**, 43, 2585.
- [9] G. R. Krishnan, K. Sreekumar, *Eur. J. Org. Chem.*, **2008**, 28, 4763.
